# Supplementary material for: Enhancement of icephobic properties based on UV-curable fluorosilicone copolymer films
Source: Royal Society of Chemistry journal article supplement (doi:10.1039/c5ra15920b), 2015-01-01
Supplement: c5ra15920b1.pdf [file c5ra15920b1.pdf]

**Electronic Supplementary Information (ESI)**  
**Enhancement of icephobic properties based on UV-curable**  
**fluorosilicone copolymer films**

Xiaohui Li,<sup>a</sup> Kaiqiang Zhang,<sup>a</sup> Yunhui Zhao,<sup>a</sup> Kongying Zhu,<sup>b</sup> Xiaoyan Yuan <sup>\*a</sup>

<sup>a</sup> School of Materials Science and Engineering, Tianjin Key Laboratory of Composite  
and Functional Materials, Tianjin University, Tianjin 300072, China

<sup>b</sup> Analysis and Measurement Center, Tianjin University, Tianjin 300072, China

\*Corresponding author: [yuanxy@tju.edu.cn](mailto:yuanxy@tju.edu.cn) or [xyuan28@yahoo.com](mailto:xyuan28@yahoo.com)

**Table S1** Compositions of UV-curable films containing fluorosilicone copolymers.

| Sample        | PDMS-SH<br>(g) | OVPOSS<br>(g) | PDMS- <i>b</i> -(PFMA-SH) <sub>2</sub><br>(g) |
|---------------|----------------|---------------|-----------------------------------------------|
| <b>F0%</b>    | 1.0            | 0.1           | -                                             |
| <b>12F1%</b>  | 1.0            | 0.1           | 0.01                                          |
| <b>12F3%</b>  | 1.0            | 0.1           | 0.03                                          |
| <b>12F5%</b>  | 1.0            | 0.1           | 0.05                                          |
| <b>12F10%</b> | 1.0            | 0.1           | 0.1                                           |
| <b>12F20%</b> | 1.0            | 0.1           | 0.2                                           |
| <b>12F30%</b> | 1.0            | 0.1           | 0.3                                           |
| <b>12F40%</b> | 1.0            | 0.1           | 0.4                                           |
| <b>12F50%</b> | 1.0            | 0.1           | 0.5                                           |
| <b>12F60%</b> | 1.0            | 0.1           | 0.6                                           |
| <b>17F1%</b>  | 1.0            | 0.1           | 0.01                                          |
| <b>17F3%</b>  | 1.0            | 0.1           | 0.03                                          |
| <b>17F5%</b>  | 1.0            | 0.1           | 0.05                                          |
| <b>17F10%</b> | 1.0            | 0.1           | 0.1                                           |
| <b>17F20%</b> | 1.0            | 0.1           | 0.2                                           |
| <b>17F30%</b> | 1.0            | 0.1           | 0.3                                           |
| <b>17F40%</b> | 1.0            | 0.1           | 0.4                                           |
| <b>17F50%</b> | 1.0            | 0.1           | 0.5                                           |
| <b>17F60%</b> | 1.0            | 0.1           | 0.6                                           |

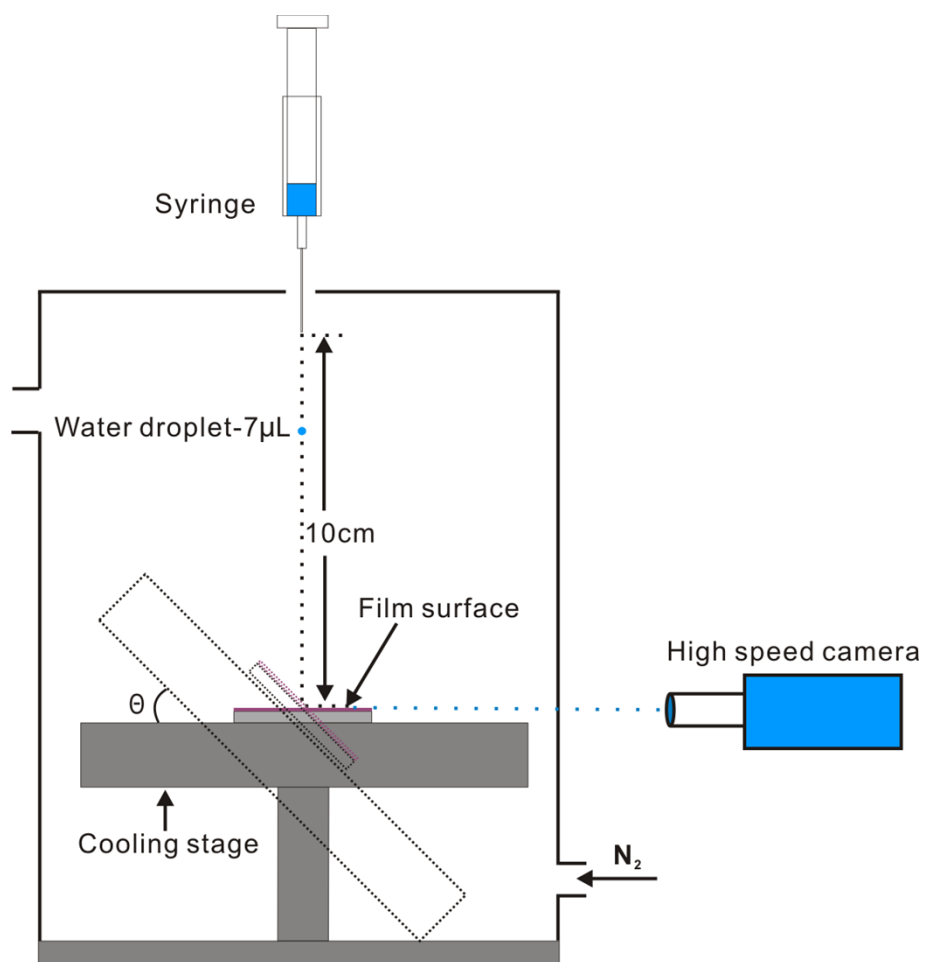

**Fig. S1** Schematic diagram of water droplets dropping on the sample surface.

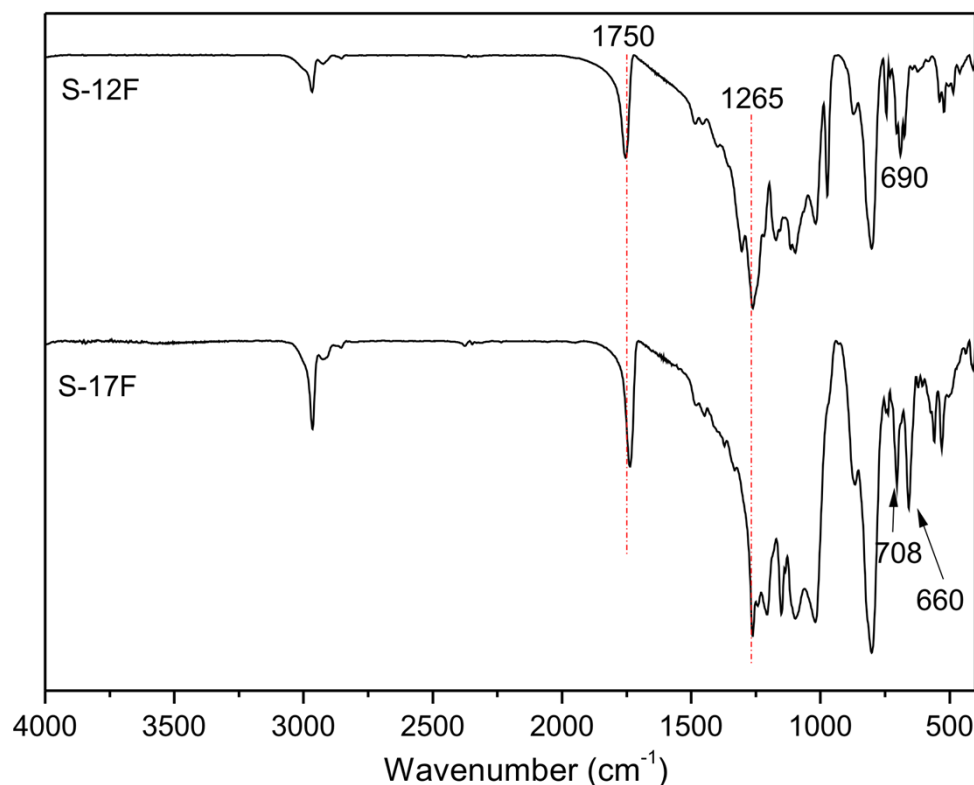

**Fig. S2** FT-IR spectra of the prepared **S-12F** and **S-17F** block copolymers. The peak at 1750 cm<sup>-1</sup> was assigned to C=O stretching vibration. The absorbances at 1265 cm<sup>-1</sup> and 1010~1120 cm<sup>-1</sup> were attributed to the Si-CH<sub>3</sub> stretching vibration and Si-O-Si asymmetric stretching vibration, respectively, which were characteristic signals of PDMS. The absorption peaks at 690 cm<sup>-1</sup> for wagging vibrations of C-F bonds was observed in the spectra of **S-12F**. For **S-17F**, the absorbances at 660 cm<sup>-1</sup> and 708 cm<sup>-1</sup> were attributed to the rocking and wagging vibrations of CF<sub>2</sub> groups.

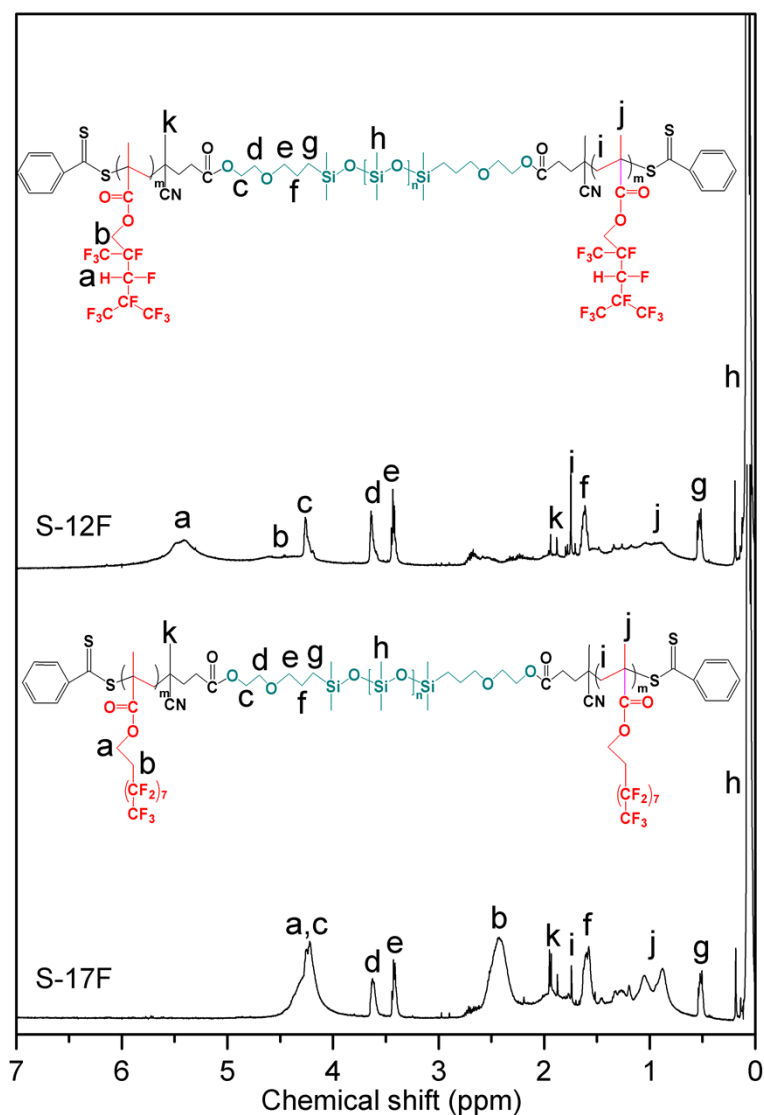

**Fig. S3**  $^1\text{H}$  NMR spectra of the prepared **S-12F** and **S-17F** block copolymers. The signals of  $\delta_{\text{H}}$  in PDMS block were observed at 0.1 ppm for the  $-\text{Si}-\text{CH}_3$  group. The characteristic  $\delta_{\text{H}}$  signals of  $-\text{O}-\text{CH}_2-\text{CH}_2-\text{O}-\text{C}=\text{O}$  and  $-\text{CH}_2\text{CH}_2\text{OCH}_2-$  groups next to PDMS block were found at 3.6 ppm and 3.4 ppm, respectively, indicating successful esterification of CPADB with HO-PDMS-OH. The typical  $\delta_{\text{H}}$  in P12FMA block were observed at 5.2–6.6 ppm and 4.2–4.6 ppm for  $-\text{CHF}$  and  $-\text{CH}_2-\text{CF}_2\text{CF}_3-$  groups correspondingly in the spectra of **S-12F**. The signals of  $\delta_{\text{H}}$  at 4.0–4.5 ppm and 2.2–2.6 ppm in the spectra of **S-17F** were assigned to  $-\text{CH}_2-\text{O}-$  and  $-\text{CH}_2-\text{CF}_2-$  groups in P17FMA block, respectively.

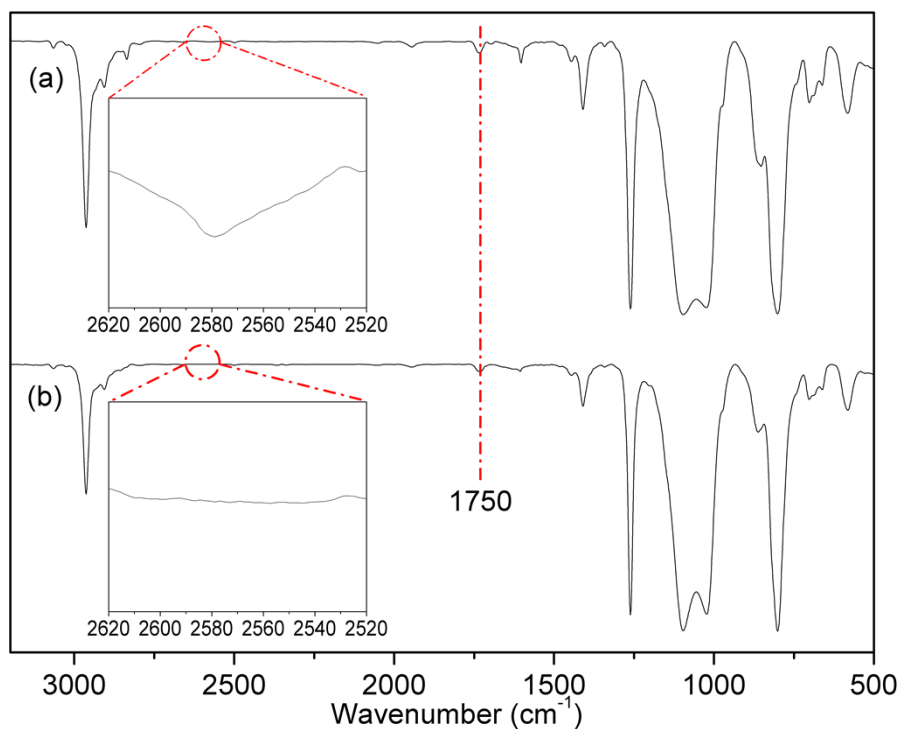

**Fig. S4** FT-IR spectra of the **17F10%** film (a) before and (b) after UV curing, suggesting absorbance changes of the thiol group. The absorbance at 1750 cm<sup>-1</sup> was attributed to the C=O stretching vibration belong to **S-17F**. The absorbance at 2580 cm<sup>-1</sup>, associated with the S-H group, disappeared after UV curing, indicating that the S-H group had reacted during the photo-curing polymerization.

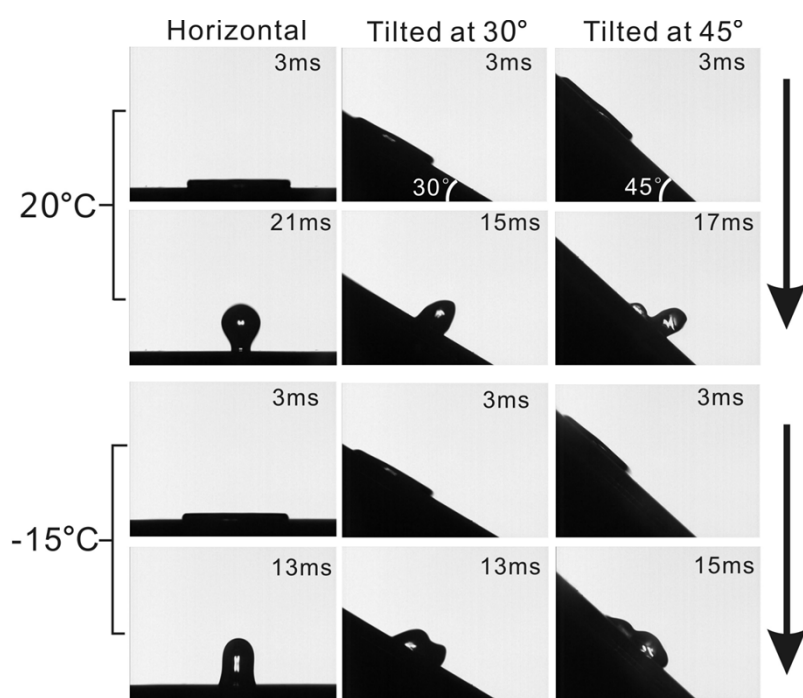

**Fig. S5** High speed digital camera images of the dynamic behavior of 7-μL water droplets dropping on the horizontal and tilted (30°, 45°) **12F50%** surface from a 10 cm height at 20°C and -15°C, respectively.

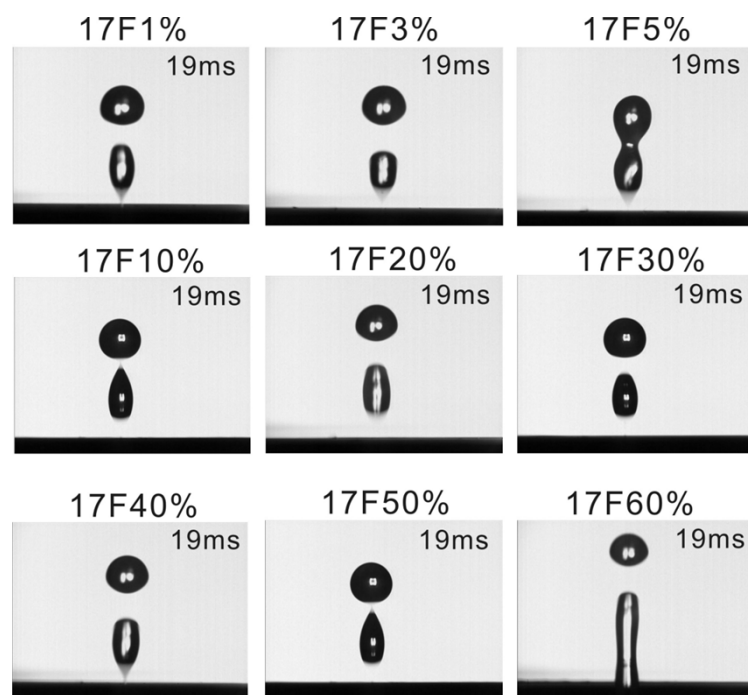

**Fig. S6** High speed digital camera images of the dynamic behavior of 7-μL water droplets dropping on the horizontal P17FMA-containing UV-curable film surfaces from a 10 cm height at -15°C.



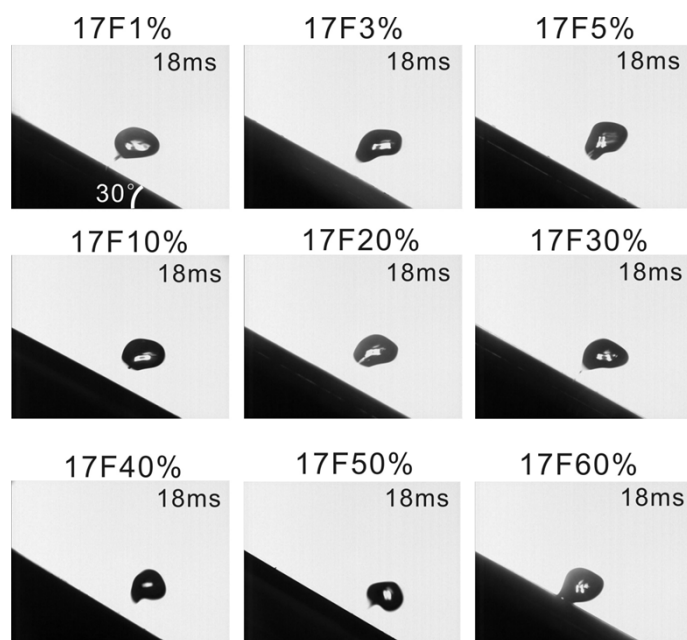

**Fig. S7** High speed digital camera images of the dynamic behavior of 7-μL water droplets dropping on the 30° tilted P17FMA-containing UV-curable film surfaces from a 10 cm height at -15°C.

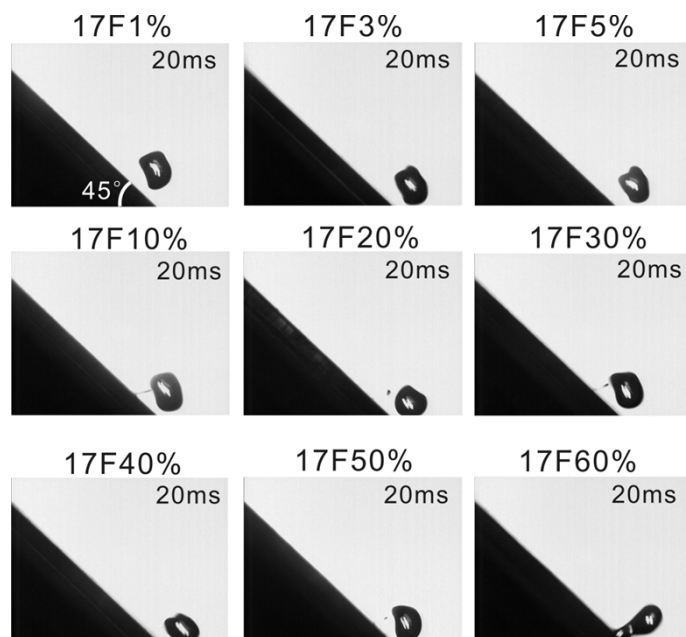

**Fig. S8** High speed digital camera images of the dynamic behavior of 7- $\mu$ L water droplets dropping on the 45° tilted P17FMA-containing UV-curable film surfaces from a 10 cm height at -15°C.
